# Supplementary material
Source: Elsevier journal article supplement (https://rcastoragev2.blob.core.windows.net/15d6806172fffd492044152b0bf435fb/mmc1.pdf)

**Cell Stem Cell, Volume 28**

## **Supplemental Information**

### **Cell Surface Mechanics Gate**

#### **Embryonic Stem Cell Differentiation**

**Martin Bergert, Sergio Lembo, Sumana Sharma, Luigi Russo, Danica Milovanović, Kristjan H. Gretarsson, Mandy Börmel, Pierre A. Neveu, Jamie A. Hackett, Evangelia Petsalaki, and Alba Diz-Muñoz**

**Supplemental Figure 1. Quantifications of naïve pluripotency features and expression levels. Related to Figure 1 and 2.** (A) Normalized GFP geometric mean intensities for mESCs Rex1-GFPd2 in 2i/LIF medium plated for 48h on Gelatin or on Laminin 511 (L511). (B) Normalized geometric mean intensities of Nanog immunofluorescence levels for mESCs Rex1-GFPd2 in 2i/LIF medium plated for 48h on Gelatin or on Laminin 511.  $n_{\text{Exp}}$ : number of independent experiments. Error bars: SEM. p-Values: Welch's *t*-test. (C) Normalized GFP geometric mean intensities for mESC Rex1-GFPd2 cells in 2i/LIF medium after plating for 48 h on Laminin 511-coated hydrogels of 25 kPa or 0.5 kPa. (D) Normalized geometric mean intensities of Nanog immunofluorescence levels for mESC Rex1-GFPd2 cells in 2i/LIF medium after plating for 48 h on Laminin 511-coated hydrogels of 25 kPa or 0.5 kPa.  $n_{\text{Exp}}$ : number of independent experiments. Error bars: SEM. p-Values: Welch's *t*-test. (E) mCherry geometric mean intensities for mESC Rex1-GFPd2 *ind*-CAEz, *ind*-DNEz and *ind*-mCherry cells during exit from pluripotency in N2B27±Dox medium at 48 h.  $n_{\text{Exp}}$ : number of independent experiments. Error bars: SEM. (F) Representative fluorescent images of naïve mESC Rex1-GFPd2 *ind*-PMBD (plasma membrane-binding domain) and mESC Rex1-GFPd2 *ind*-ABD (actin-binding domain) cells in 2i/LIF+Dox medium. Scale bar: 10  $\mu\text{m}$ . (G) mCherry geometric mean intensities for mESC Rex1-GFPd2 *ind*-iMC, *ind*-PMBD and *ind*-ABD cells during exit from pluripotency in N2B27±Dox medium at 48 h.  $n_{\text{Exp}}$ : number of independent experiments. Error bars: SEM. (H-I) Bar plots of naïve pluripotency markers (Kalkan et al., 2017) upregulated upon CAEzrin or iMC-linker expression (RNAseq-derived, data from 3 independent experiments). All pairs (48 h vs. 48 h+Dox) are significant ( $p < 0.01$ ). (J) Global DNA methylation levels of mESC Rex1-GFPd2 *ind*-CAEz and *ind*-iMC cells plated for 48 h in N2B27 media or in N2B27+Dox media. Gray region depicts typical hypermethylation regime (60-80 %mCpG) acquired upon 2i/LIF withdrawal (Hackett et al., 2018).  $n_{\text{Exp}}$ : number of independent experiments. Error bars: SEM. p-Values: Welch's *t*-test. (K) Schematic of the re-plating assay used to assess the pluripotency state (Betschinger et al., 2013; Cirera-Salinas and Ciaudo, 2017). (L) Schematic of embryoid body formation.

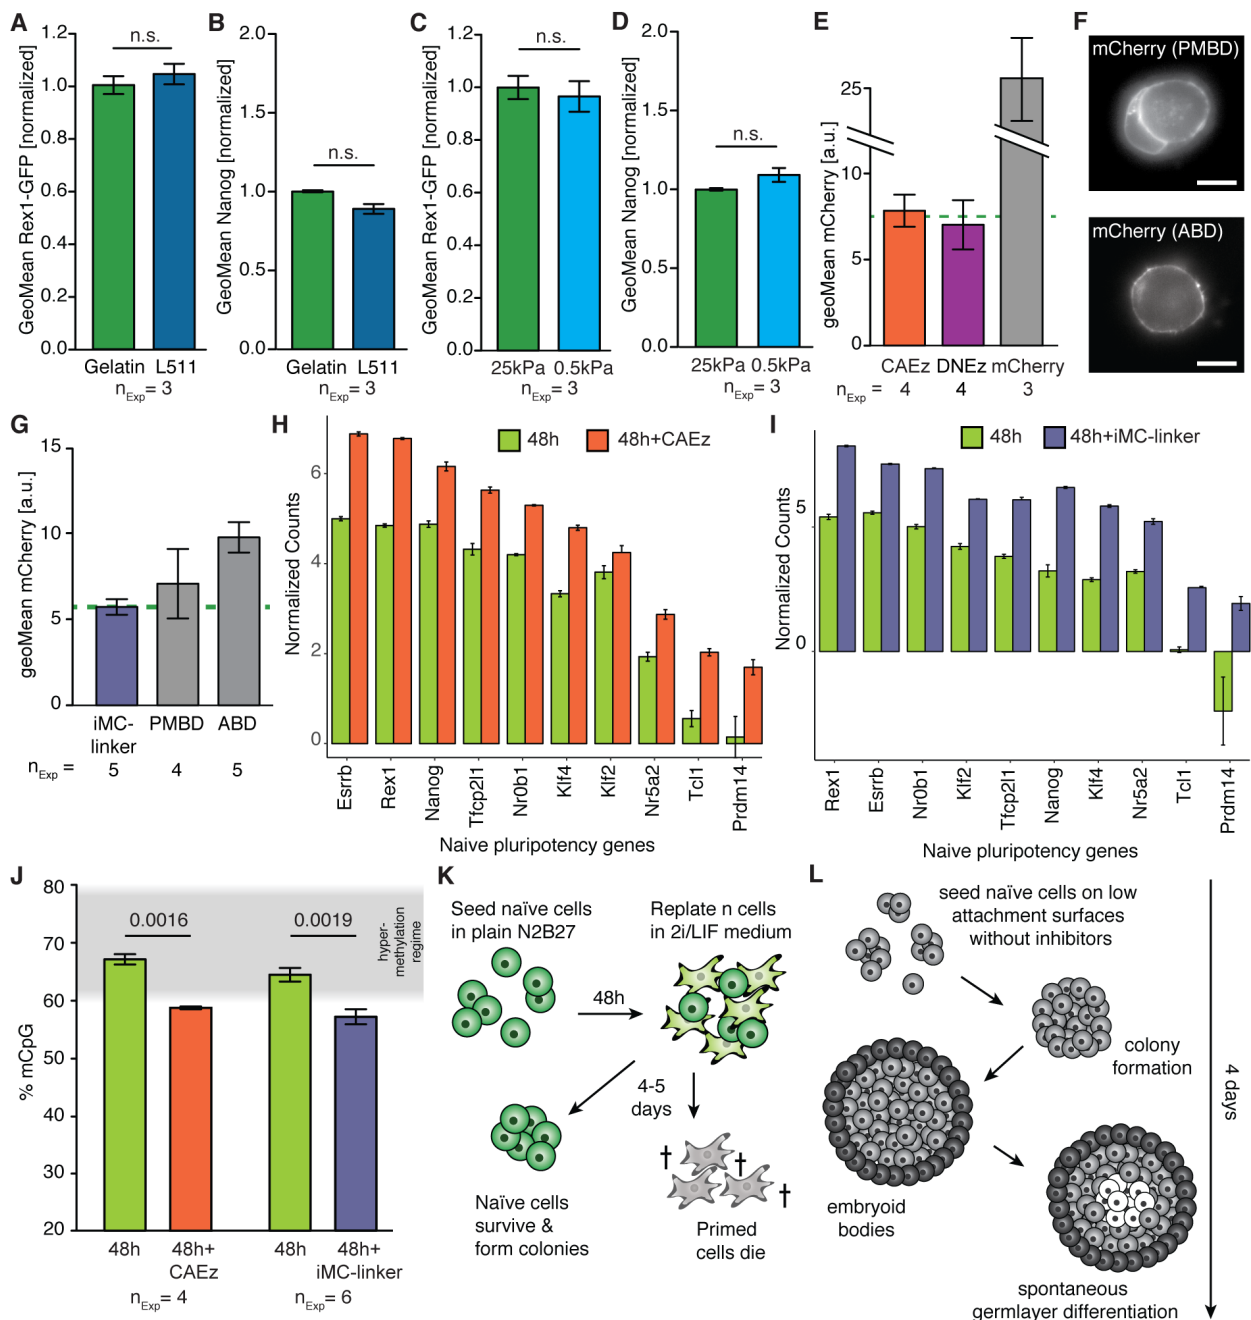

**Supplemental Figure 2. DNEzrin decreases MCA but does not speed up exit from naïve pluripotency. Related to Figure 2.** (A) Representative brightfield (DIC) and fluorescent images of mESC Rex1-GFPd2 *ind*-DNEz cells expressing DNEz-mCherry in 2i/LIF+Dox medium. (B) Force-velocity curve from dynamic tether pulling on mESC Rex1-GFPd2 *ind*-DNEz cells in 2i/LIF medium and during exit from pluripotency in N2B27±Dox medium at 48 h. Data points are mean tether force  $f \pm \text{SEM}$  at 2, 5, 10 and 30  $\mu\text{m}/\text{sec}$  pulling velocity. n: number of cells analysed in 3 independent experiments. Insert shows mean and standard deviation of the MCA parameter  $a$  obtained from Monte-Carlo-based fitting (see STAR Methods for details). p-Value: Z-test. (C) Normalized GFP geometric mean intensities for mESC Rex1-GFPd2 *ind*-DNEz cells plated for 48 h in 2i/LIF or in 2i/LIF+Dox medium.  $n_{\text{Exp}}$ : number of independent experiments. Error bars: SEM. p-Values: Welch's  $t$ -test. (D) Normalized geometric mean intensities of Nanog immunofluorescence levels for mESC Rex1-GFPd2 *ind*-DNEz cells plated for 48h in 2i/LIF or in 2i/LIF+Dox medium.  $n_{\text{Exp}}$ : number of independent experiments. Error bars: SEM. p-Values: Welch's  $t$ -test. (E) Normalized GFP geometric mean intensities for mESC Rex1-GFPd2 *ind*-DNEz and *ind*-mCherry cells in 2i/LIF medium and during exit from naïve pluripotency in N2B27+/-Dox medium at 48 h.  $n_{\text{Exp}}$ : number of independent experiments. Error bars: SEM. p-Value: Welch's  $t$ -test. (F) Normalized colony number (Dox/Ctrl) mESC Rex1-GFPd2 *ind*-DNEz and *ind*-mCherry cells re-plated after a 48 h exit in N2B27+/-Dox medium.  $n_{\text{Exp}}$ : number of independent experiments. Error bars: SEM. p-Value: Welch's  $t$ -test.

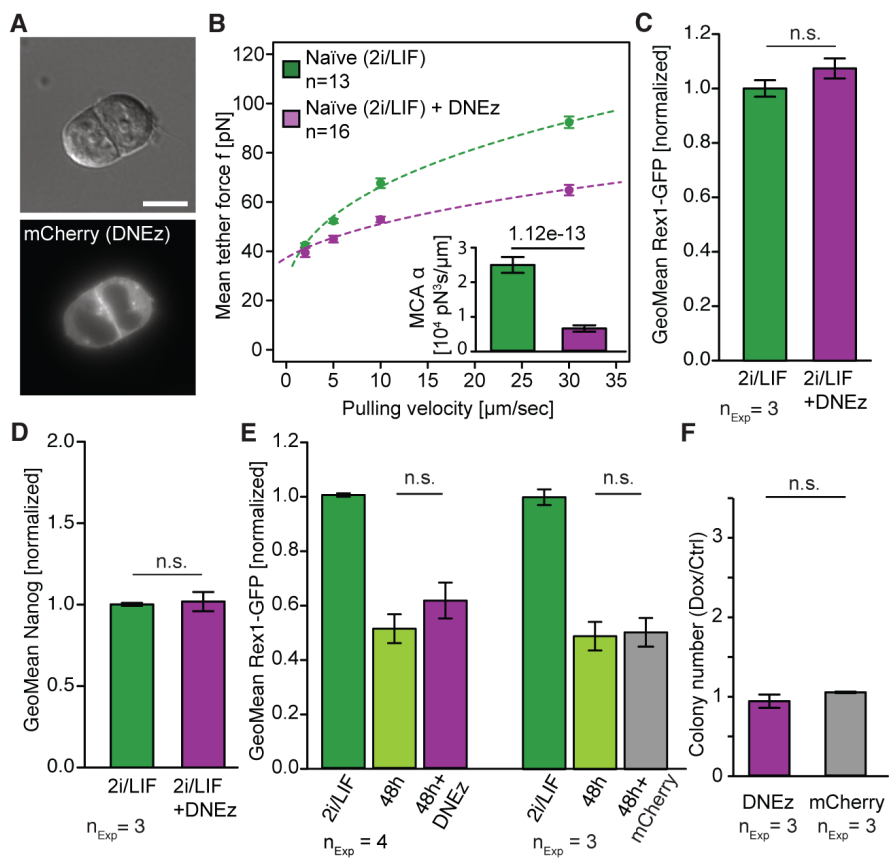

Supplement: mmc1 [file mmc1.pdf]
